# Supplementary material for: Thermally activated delayed fluorescence in a deep red dinuclear iridium(iii) complex: a hidden mechanism for short luminescence lifetimes
Source: Royal Society of Chemistry journal article supplement (doi:10.1039/d3sc04450e), 2023-01-01
Supplement: d3sc04450e1.pdf [file d3sc04450e1.pdf]

*Supporting information*

**Thermally Activated Delayed Fluorescence in a Deep Red  
Dinuclear Iridium(III) Complex:  
a Hidden Mechanism for Short Luminescence Lifetimes**

Piotr Pander,<sup>a,b,c\*</sup> Andrey V. Zaytsev,<sup>d</sup> Amit Sil,<sup>e</sup> Glib V. Baryshnikov,<sup>f</sup> Farhan Siddique,<sup>f,g</sup>  
J. A. Gareth Williams,<sup>e\*</sup> Fernando B. Dias<sup>c\*</sup> and Valery N. Kozhevnikov<sup>d\*</sup>

<sup>a</sup> *Faculty of Chemistry, Silesian University of Technology, M. Strzody 9, 44-100 Gliwice, Poland.*

<sup>b</sup> *Centre for Organic and Nanohybrid Electronics, Silesian University of Technology, Konarskiego 22B, 44-100 Gliwice, Poland.*

<sup>c</sup> *Department of Physics, Durham University, South Road, Durham, DH1 3LE, U.K.*

<sup>d</sup> *Department of Applied Sciences, Northumbria University, Newcastle upon Tyne, NE1 8ST, U.K.*

<sup>e</sup> *Department of Chemistry, Durham University, South Road, Durham, DH1 3LE, U.K.*

<sup>f</sup> *Laboratory of Organic Electronics, Department of Science and Technology, Linköping University, SE-60174 Norrköping, Sweden.*

<sup>g</sup> *Department of Pharmaceutical Chemistry, Faculty of Pharmacy, Bahauddin Zakariya University, Multan 60800, Pakistan.*

**Table of contents**

|                                      |    |
|--------------------------------------|----|
| 1. General.....                      | 2  |
| 2. Synthesis.....                    | 5  |
| 3. X-ray crystallography .....       | 13 |
| 4. Theory.....                       | 17 |
| 5. Photophysics.....                 | 19 |
| a) Solution state.....               | 19 |
| b) Solid film (polymer matrix) ..... | 21 |
| 6. Electrochemistry .....            | 24 |
| 7. OLED devices.....                 | 25 |
| 8. References .....                  | 26 |

# 1. General

## Theory

We use density functional theory (DFT) and time-dependent DFT (TD-DFT) as well as the quasi-degenerate perturbation theory (QDPT)<sup>1,2</sup> with zeroth-order regular approximation (ZORA)<sup>3,4</sup> implemented in Orca 5.0.3<sup>5,6</sup> in order to gain an additional insight into the luminescence mechanisms in **1**. Ground state ( $S_0$ ) and triplet excited state ( $T_1$ ) geometries were optimised at the BP86<sup>7</sup>/def2-TZVP<sup>8</sup>/CPCM(toluene) level of theory which was found to be the most optimal for this task. Singlet and triplet radiative rates were calculated using ZORA-corrected def2-TZVP basis sets<sup>8</sup> for light atoms and a segmented all-electron relativistically contracted (SARC) def2-TZVP basis set for Ir. All molecular orbital (MO) iso surfaces were visualised using Gabedit 2.5.0.<sup>9</sup>

Geometry optimisations were performed at the BP86<sup>7</sup>/def2-TZVP<sup>8</sup> level of theory with def2/J<sup>10</sup> auxiliary basis set. Atom-pairwise dispersion correction with the Becke-Johnson damping scheme (D3BJ)<sup>11,12</sup> was included in the calculation. All geometries were verified to be true energy minima by a frequency calculation. All optimisations were performed with tight SCF and geometry convergence criteria. Excited state energy of TDDFT states was calculated using the resultant  $S_0$  or  $T_1$  geometry. In this case relativistically corrected triple-zeta basis sets with the zeroth-order regular approximation (ZORA)<sup>3,4</sup> were used: ZORA-def2-TZVP<sup>8</sup> with the SARC/J<sup>13</sup> auxiliary basis for all atoms except Ir for which a segmented all-electron relativistically contracted (SARC) SARC-ZORA-TZVP<sup>13</sup> basis set was used. Spin-orbit coupling (SOC) calculations were performed as implemented in the ORCA software. SOC matrix elements (SOCME) and SOC-corrected excitations (SOC states) were computed using the same settings as for the TDDFT states. The RI-SOMF(1X) setting was used to accelerate SOC calculations.

## Electrochemistry

Cyclic voltammetry was conducted in a three-electrode, one-compartment cell. All measurements were performed using 0.1 M  $\text{Bu}_4\text{NBF}_4$  (99%, Sigma Aldrich, dried) solution in dichloromethane (ExtraDry AcroSeal®, Acros Organics) as the supporting electrolyte. All solutions were bubbled with nitrogen prior to the measurement and the measurement itself was conducted in nitrogen atmosphere. Electrodes: working (Pt disc  $d = 1$  mm), counter (Pt wire) and reference (Ag/AgCl calibrated against ferrocene) were used in the study. All cyclic voltammetry measurements were performed at room temperature with a scan rate of  $50 \text{ mV s}^{-1}$ .

Ionization potential (IP) and electron affinity (EA) are obtained from onset redox potentials; these figures correspond to HOMO and LUMO values, respectively. The ionization potential is calculated from onset oxidation potential  $\text{IP} = E_{\text{ox}}^{\text{CV}} + 5.1$  and the electron affinity is calculated from onset

reduction potential  $E_A = E_{red}^{CV} + 5.1$ .<sup>14,15,16,17</sup> An uncertainty of  $\pm 0.02$  V is assumed for the electrochemical onset potentials.

## Photophysics

Absorption spectra of  $10^{-5}$  M solutions were recorded with UV-3600 double beam spectrophotometer (Shimadzu). Photoluminescence (PL) spectra of solutions and films were recorded using a QePro compact spectrometer (Ocean Optics) or FluoroLog fluorescence spectrometer (Jobin Yvon). Photoluminescence decays in film were recorded using nanosecond gated luminescence and lifetime measurements (from 400 ps to 1 s) using the third harmonic of a high-energy pulsed Nd:YAG laser emitting at 355 nm (EKSPLA). The emitted light was focused onto a spectrograph and detected with a sensitive gated iCCD camera (Stanford Computer Optics) having sub-nanosecond resolution. Time-resolved measurements were performed by exponentially increasing gate and integration times. Further details are available in reference.<sup>18</sup> Time-resolved decays in solution were recorded with a Horiba DeltaFlex TCSPC system using a 330 nm SpectraLED light source. Temperature-dependent experiments were conducted using a liquid nitrogen cryostat VNF-100 (sample in flowing vapour, Janis Research) under nitrogen atmosphere, while measurements at room temperature were recorded under vacuum in the same cryostat. Solutions were degassed using five freeze-pump-thaw cycles. Thin films in polystyrene were deposited from chloroform solutions. The films were fabricated through spin-coating and dried under vacuum at room temperature. Solid state emission spectra and photoluminescence quantum yields were obtained using an integrating sphere (Labsphere) coupled with a 365 nm LED light source and QePro (Ocean Optics) detector.

### *Determination of photoluminescence quantum yields in solution*

Photoluminescence quantum yields were obtained using a gradient method in which we study relation (gradient) between the total photoluminescence intensity and absorbance at the excitation wavelength (same for both standard and analyte) in a range of concentrations for both analyte and standard – see equation below. We only consider data points with a constant gradient, so that the relation between photoluminescence intensity and absorbance is linear – indication of the photoluminescence yield being independent of concentration in this region. The eligible concentration range was  $10^{-6}$ - $10^{-5}$  M while absorbance of the standard was kept at below 0.05.

$$\Phi_x = \Phi_{standard} \left( \frac{grad_x}{grad_{standard}} \right) \left( \frac{\eta_x^2}{\eta_{standard}^2} \right)$$

Where:  $\Phi_x$ ,  $\Phi_{standard}$  are the photoluminescence quantum yield of the analyte and standard, respectively;  $grad_x$ ,  $grad_{standard}$  are the gradients of the best linear fits of photoluminescence

intensity versus absorbance at  $\lambda_{\text{ex}}$  for the analyte and standard, respectively;  $\eta_x$  and  $\eta_{\text{standard}}$  are the refractive indices of the solvents used for the analyte and standard, respectively.

### **OLED devices**

OLEDs were fabricated by spin-coating / evaporation hybrid method. The hole injection layer (PEDOT AL4083), hole transport layer PVKH, and emitting layer (TCTA:PO-T2T + dopant) were spin-coated, whereas the electron transport layer (PO-T2T) and cathode (LiF/Al) were evaporated. We produced devices of  $4 \times 2$  mm pixel size. 2,4,6-Tris[3-(diphenylphosphiny)phenyl]-1,3,5-triazine (PO-T2T, LUMTEC), tris(4-carbazoyl-9-ylphenyl)amine (TCTA, LUMTEC), poly(*N*-vinylcarbazole) (PVKH, Sigma Aldrich,  $M = 10^6$  Da), LiF (99.995%, Sigma Aldrich), and aluminium pellets (99.9995%, Lesker) were purchased from the companies indicated in the parentheses. We used pre-patterned indium-tin-oxide (ITO) on glass substrate with a sheet resistance of  $20 \Omega \text{ cm}^{-2}$  and ITO thickness of 100 nm. The substrates were cleaned by sonicating in acetone and subsequently in isopropanol for 15 minutes each and then treated with oxygen plasma for 6 minutes at full power. PEDOT AL4083 was spun-coated and annealed on a hotplate at  $120 \text{ }^\circ\text{C}$  for 15 min to give a 30 nm film. Emitting layer was deposited from chloroform:chlorobenzene (95:5 v/v) solution (20 mg  $\text{mL}^{-1}$  total solids content). The dopant was dissolved in the solution of blend host in order to obtain final 5-12% concentration in the emitting layer. All solutions were filtrated directly before application using a PVDF (organic solvents) and PES (PEDOT AL4083) syringe filter with  $0.45 \mu\text{m}$  pore size. All other layers were thermally evaporated using Kurt J. Lesker Spectros II deposition system at  $10^{-6}$  mbar base pressure. All organic materials and aluminium were deposited at a rate of  $1 \text{ \AA s}^{-1}$ . The LiF layer was deposited at a rate of  $0.1\text{--}0.2 \text{ \AA s}^{-1}$ . Characterisation of OLED devices was conducted in a 10 inch integrating sphere (Labsphere) connected to a Source Measure Unit (SMU) Keithley 2400 and coupled with a spectrometer USB4000 (Ocean Optics). Further details are available in reference <sup>19</sup>.

## 2. Synthesis

### Proligand **H<sub>2</sub>L**

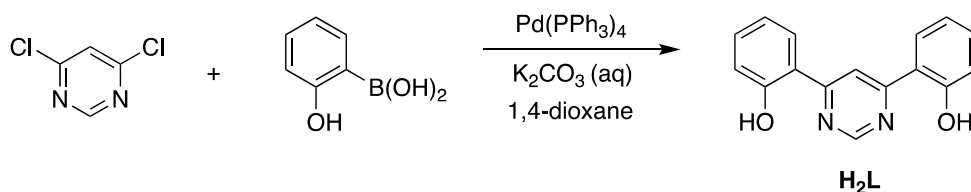

4,6-Dichloropyrimidine (2.35 g, 15.8 mmol) and 2-hydroxybenzeneboronic acid (5.23 g, 37.9 mmol) were dissolved in 1,4-dioxane (90 mL). An aqueous solution of  $K_2CO_3$  (2 M, 37 mL) was added and the contents of the flask were deoxygenated by passing a stream of argon through the vigorously stirred emulsion for 25 min.  $Pd(PPh_3)_4$  (912 mg, 789  $\mu$ mol) was introduced under argon flow and the reaction mixture was stirred at 95°C under argon atmosphere for 20 h. The reaction mixture was cooled to room temperature and water (200 mL) was added. The resultant precipitate was filtered off and washed with water followed by petroleum ether to give **H<sub>2</sub>L** as a pale-yellow solid (2.80 g, 67%).  $^1H$  NMR ( $CDCl_3 + DMSO-d_6$ , 400 MHz)  $\delta_H = 9.02$  (s, 1H), 8.26 (s, 1H), 7.90 (d,  $J = 7.8$  Hz, 2H), 7.37 (app t, 2H), 7.01 (d,  $J = 8.3$  Hz, 2H), 6.94 (app t, 2H), 2.29 (2  $\times$  OH +  $H_2O$ ).  $^{13}C$  NMR ( $CDCl_3 + DMSO-d_6$ , 101 MHz)  $\delta_C = 164.8$  (C), 161.0 (C), 153.7 (CH), 134.0 (CH), 127.0 (CH), 119.5 (CH), 119.2 (CH), 116.8 (C), 108.9 (CH).

### Complex **1**

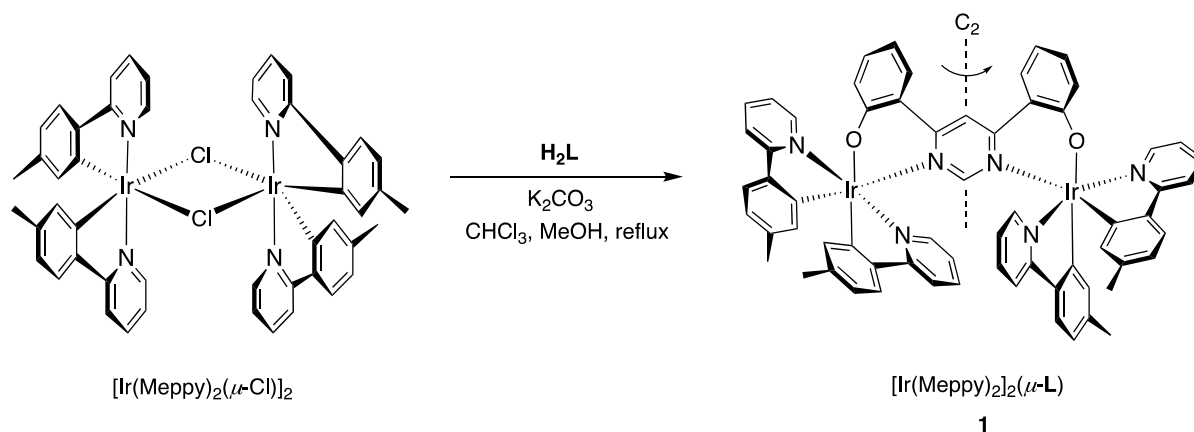

$K_2CO_3$  (98 mg, 704  $\mu$ mol) was added to a solution of **H<sub>2</sub>L** (47 mg, 176  $\mu$ mol) and  $[Ir(Meppy)_2(\mu-Cl)]_2$  (199 mg, 176  $\mu$ mol) in a mixture of methanol (25 mL) and chloroform (5 mL), and the mixture was heated to reflux for 20 h under argon atmosphere. The solvents were then removed under reduced pressure. The resulting residue was suspended in DCM and the solid was filtered off. After washing with DCM, this material was purified by flash column chromatography on silica using DCM/acetone (gradient elution 100/0  $\rightarrow$  80/20) to give complex **1** as a cherry-red solid (158 mg, 68%).  $^1H$  NMR ( $CD_2Cl_2$ , 400 MHz)  $\delta_H = 8.96$  (d,  $J = 5.8$  Hz, 2H), 7.96 (s, 1H), 7.84 (d,  $J = 5.7$  Hz,

2H), 7.60 – 7.52 (m, 4H), 7.47 - 7.31 (m, 10H), 7.03 (app t, 2H), 6.99 (s, 1H), 6.85 – 6.79 (m, 4H), 6.62 (app d, 4H), 6.35 (app t, 2H), 6.09 (d,  $J = 8.2$  Hz, 2H), 5.69 (s, 2H), 5.52 (s, 2H), 2.05 (s, 6H), 1.97 (s, 6H).  $^{13}\text{C}$  NMR ( $\text{CD}_2\text{Cl}_2$ , 101 MHz)  $\delta_{\text{C}} = 171.7$  (C), 167.7 (C), 161.9 (C), 160.6 (CH), 150.7 (CH), 150.2 (C), 149.0 (C), 148.1 (C), 142.3 (C), 141.4 (C), 139.0 (C), 138.7 (C), 136.6 (CH), 136.2 (CH), 133.4 (CH), 132.8 (CH), 132.5 (CH), 129.8 (CH), 126.7 (CH), 125.9 (C), 123.6 (CH), 122.9 (CH), 122.7 (CH), 121.5 (CH), 121.0 (CH), 119.6 (CH), 119.1 (CH), 118.0 (CH), 115.4 (CH), 21.9 ( $\text{CH}_3$ ), 21.7 ( $\text{CH}_3$ ). Elemental (CHN) analysis: calc. for  $\text{C}_{64}\text{H}_{50}\text{Ir}_2\text{N}_6\text{O}_2$ , %: C, 58.25; H 3.82; N, 6.37. Found, %: C, 58.10; H, 3.81; N, 6.33.

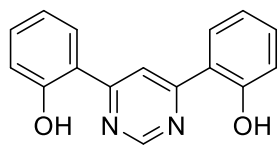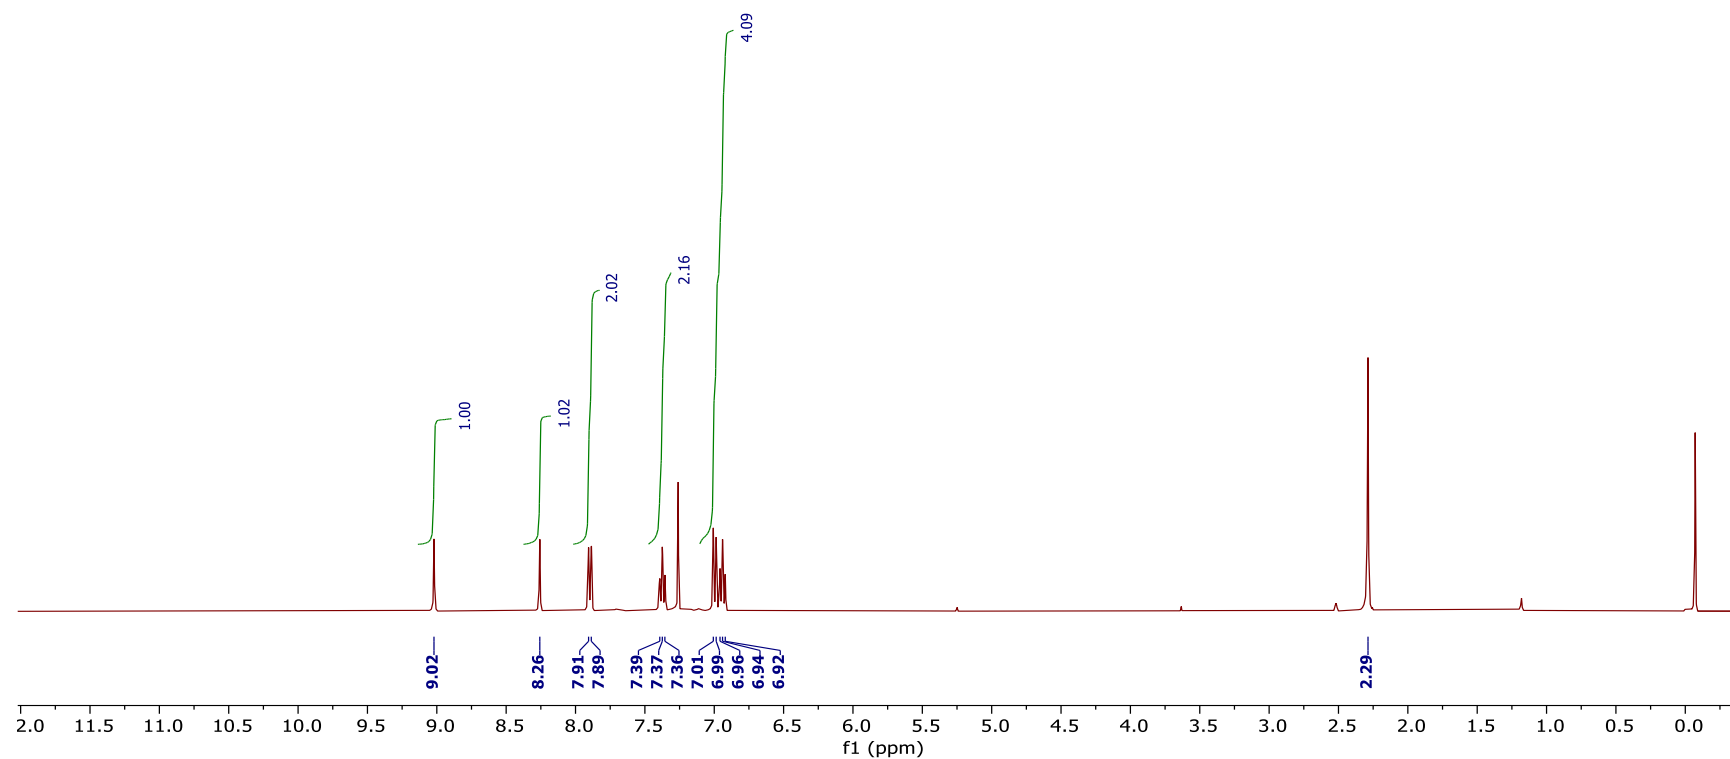

Figure S2.1.  $^1\text{H}$  NMR spectrum of the proligand  $\text{H}_2\text{L}$  in  $\text{CDCl}_3$ .

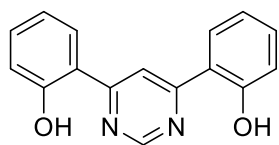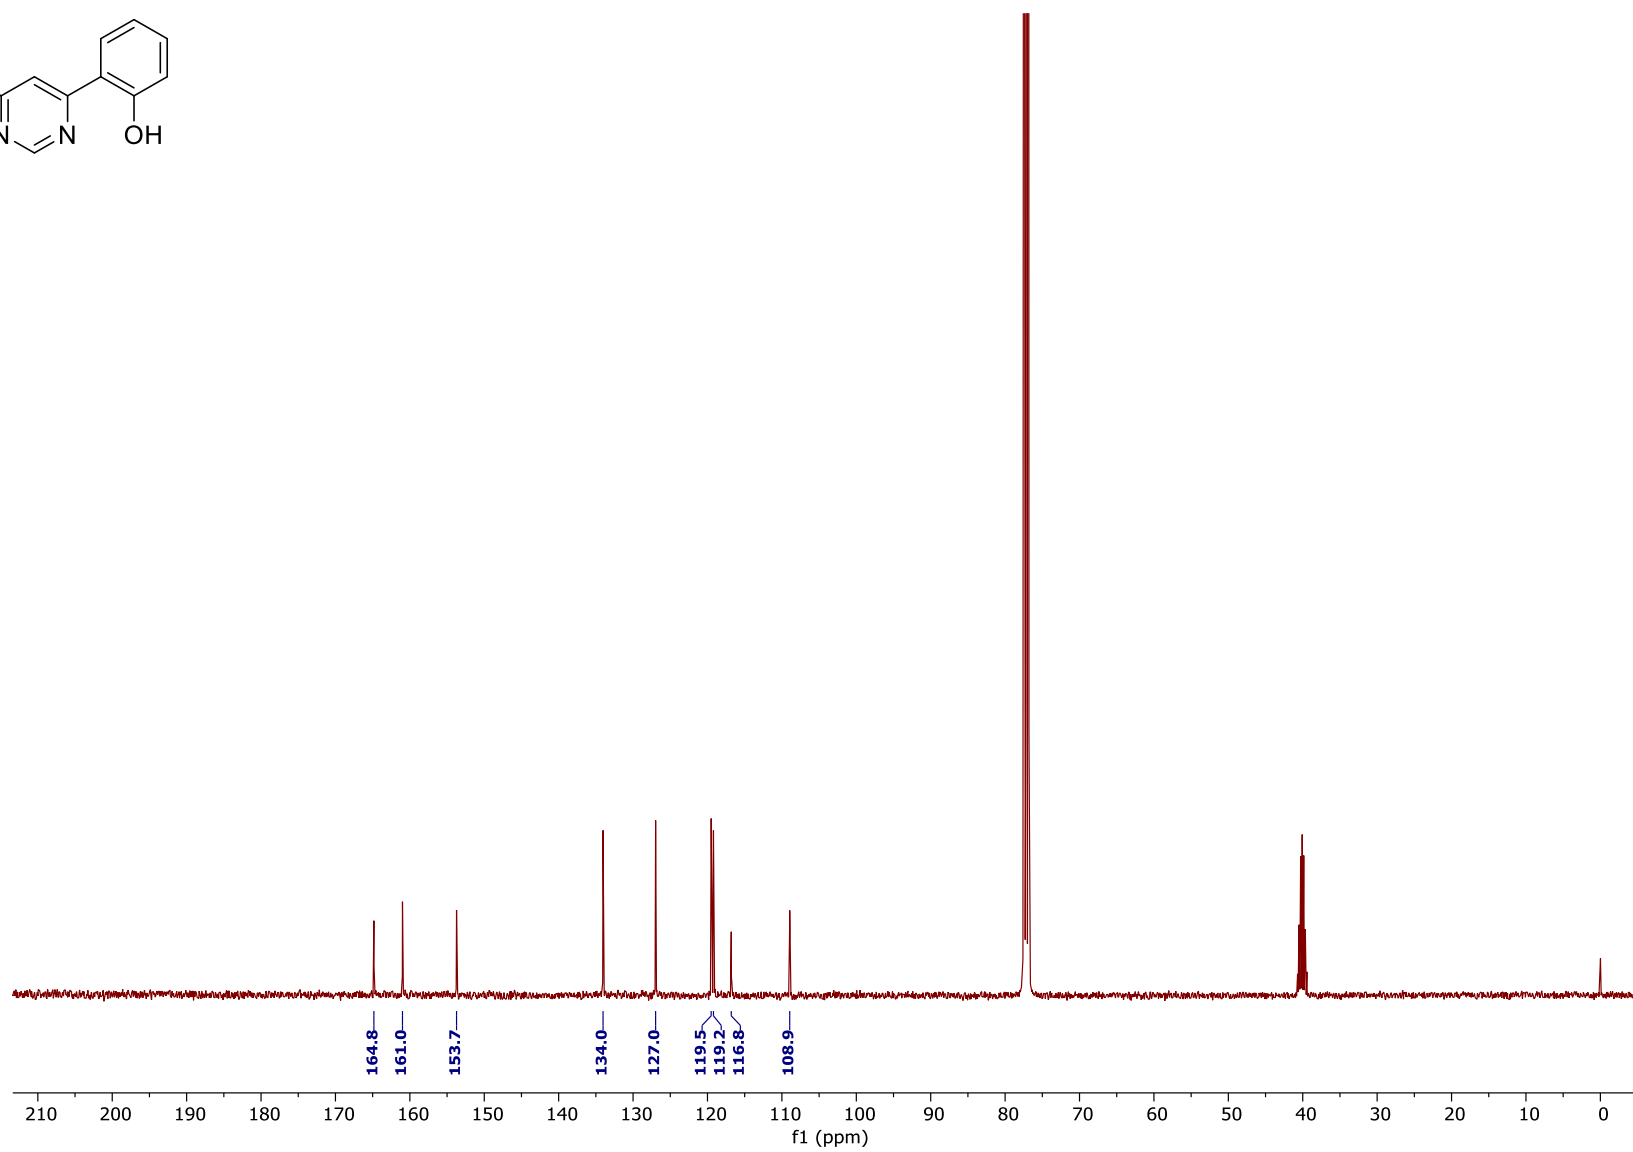

Figure S2.2.  $^{13}C$  NMR spectrum of the proligand  $H_2L$  in  $CDCl_3$ .



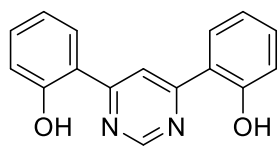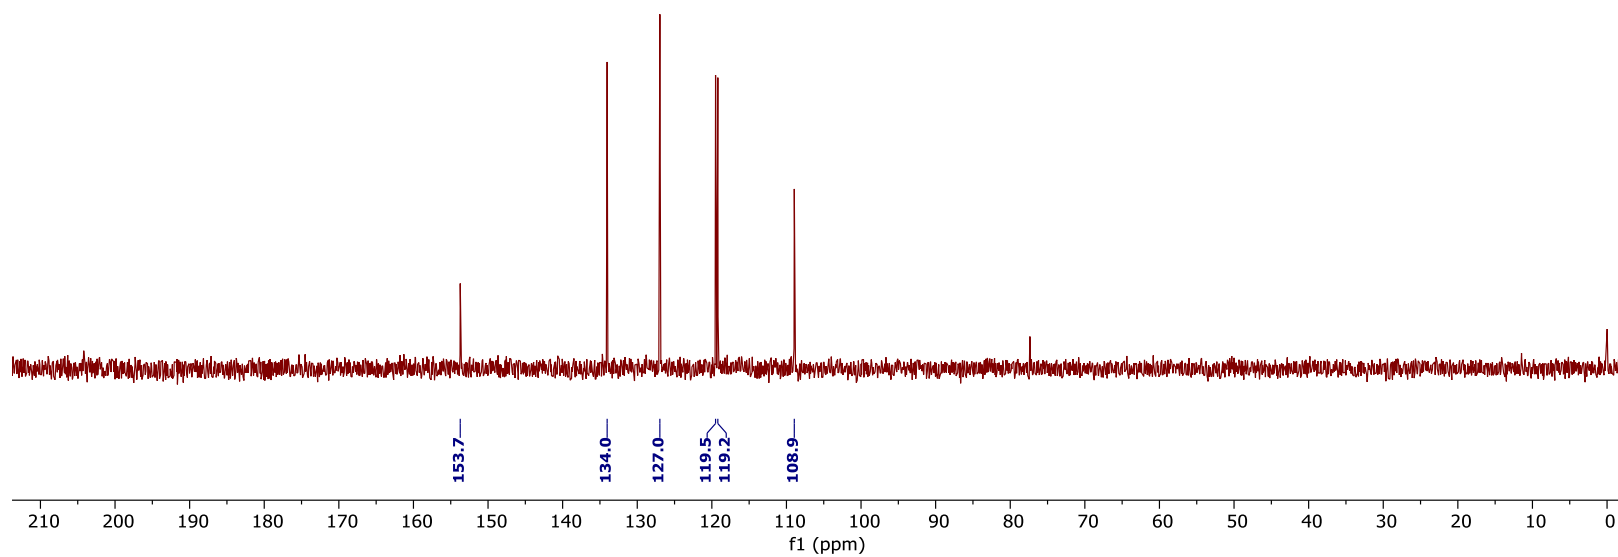

**Figure S2.3.** <sup>13</sup>C (DEPT135) NMR spectrum of the proligand **H<sub>2</sub>L** in CDCl<sub>3</sub>.

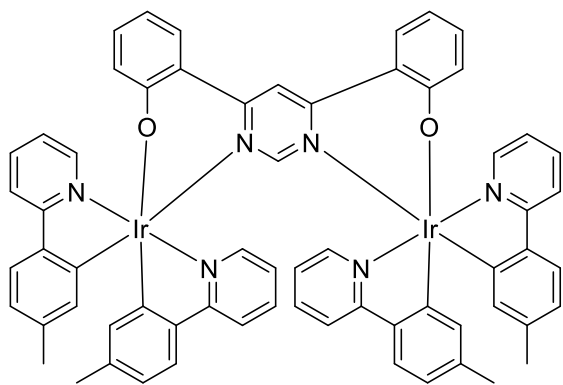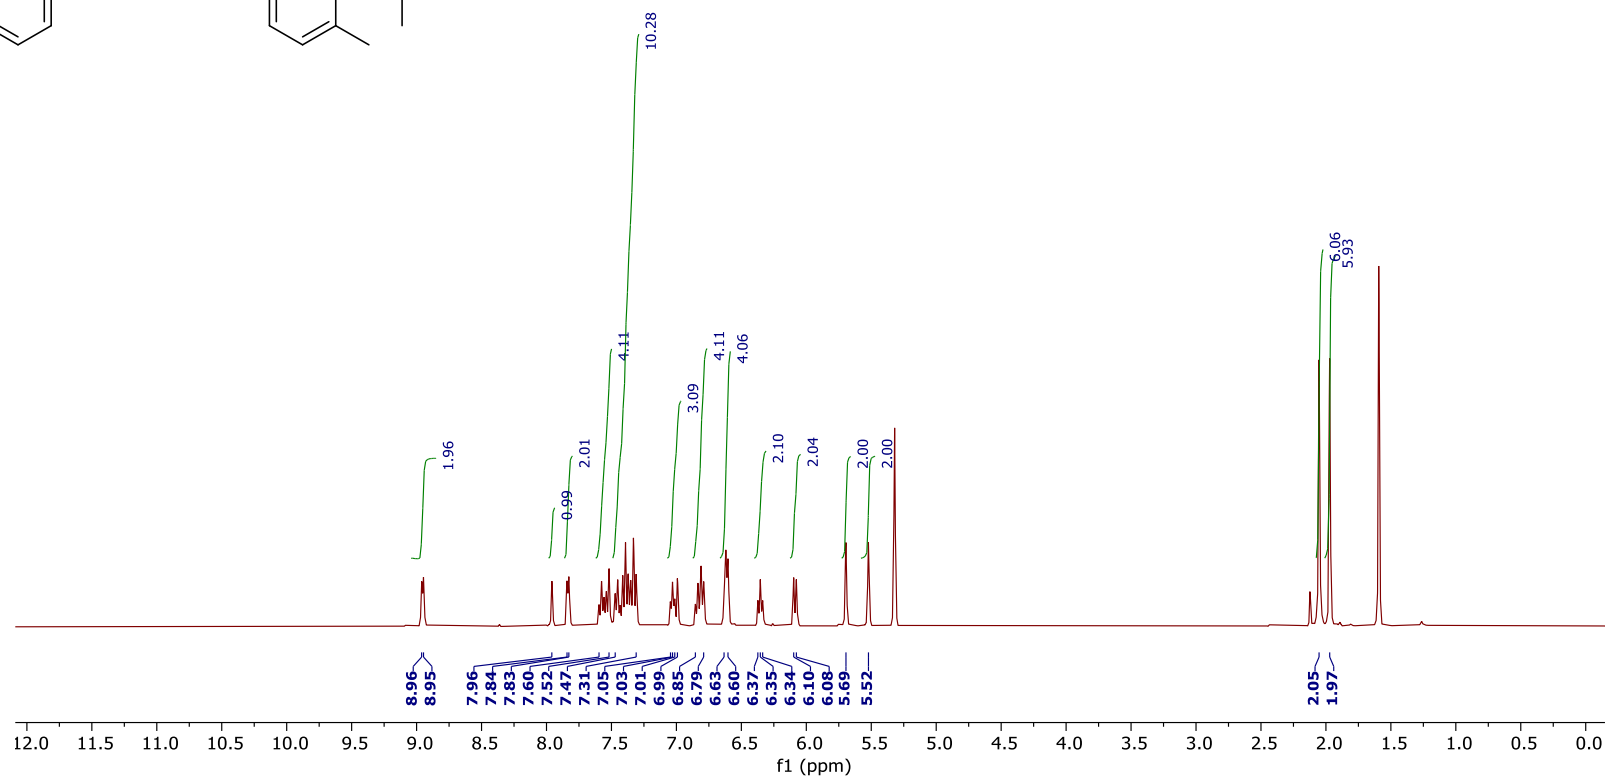

Figure S2.4.  $^1\text{H}$  NMR spectrum of the complex **1** in  $\text{CDCl}_3$ .

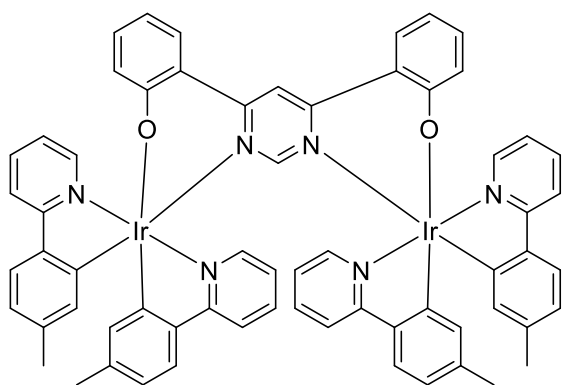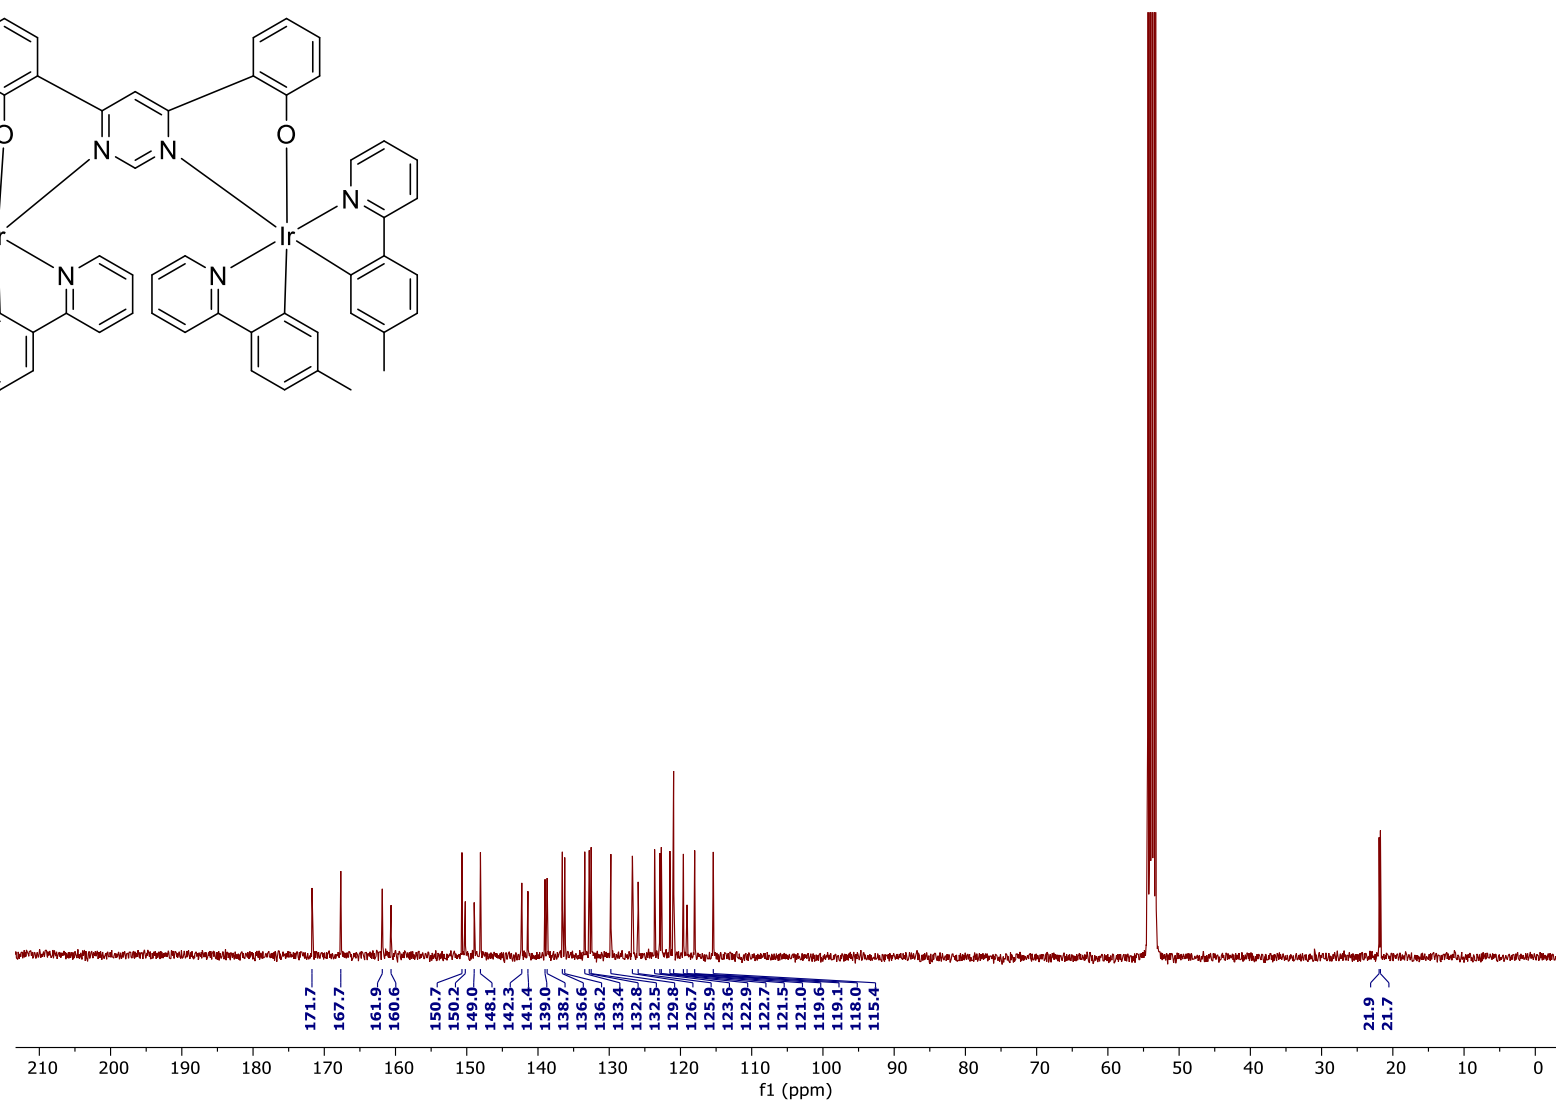

Figure S2.5. <sup>13</sup>C NMR spectrum of the complex 1 in CDCl<sub>3</sub>.

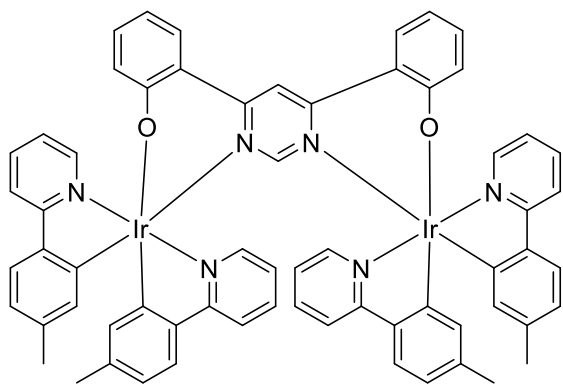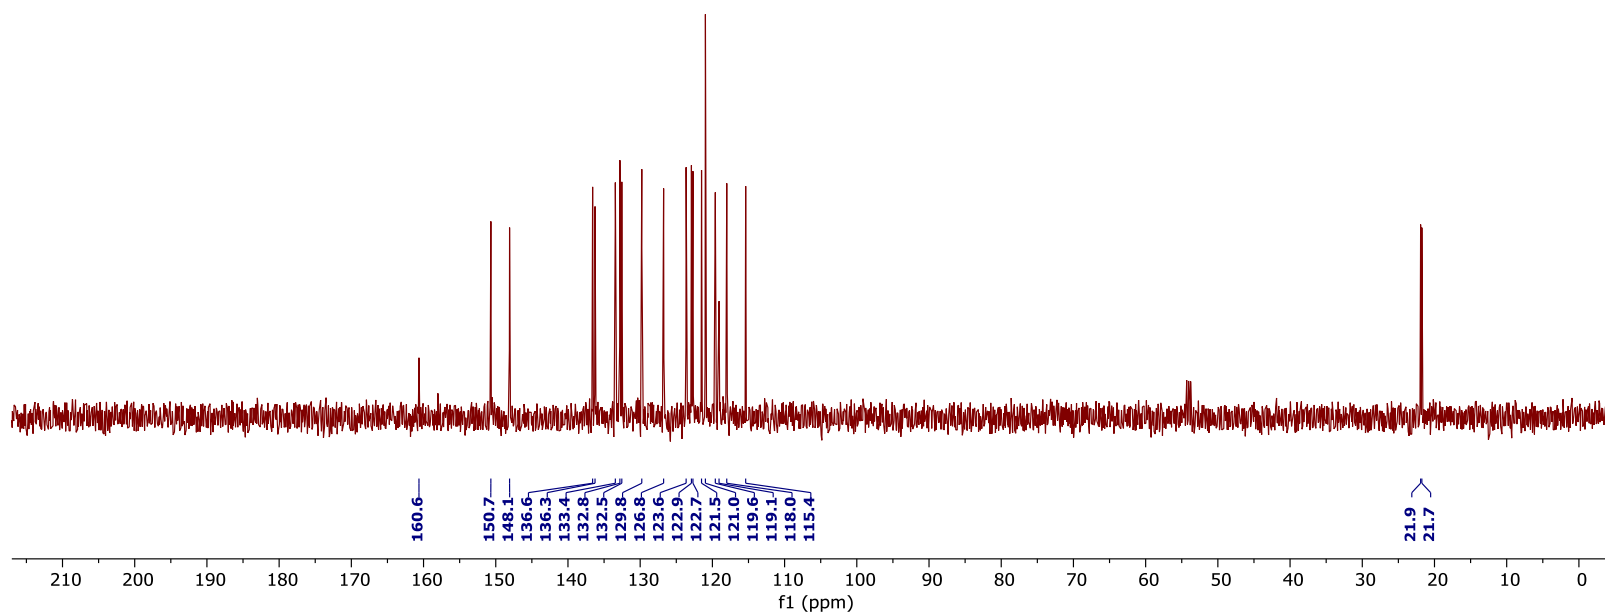

**Figure S2.6.**  $^{13}\text{C}$  (DEPT 135) NMR spectrum of the complex **1** in  $\text{CDCl}_3$ .

### 3. X-ray crystallography

The X-ray single crystal data for complex **1** were collected at a temperature of 130.0 K using MoK $\alpha$  radiation ( $\lambda = 0.71073 \text{ \AA}$ ) on a Bruker D8 Venture (Photon III MM C14 CPAD detector, I $\mu$ S-3-microsource, focusing mirrors) 3-circle diffractometer equipped with a Cryostream (Oxford Cryosystems) open-flow nitrogen cryostat. The structure was solved by a direct method and refined by full-matrix least squares on  $F^2$  for all data using Olex2<sup>20</sup> and SHELXTL<sup>21</sup> software. All non-hydrogen atoms were refined in anisotropic approximation: hydrogen atoms were placed in the calculated positions and refined in riding mode. Crystal data and parameters of refinement are listed in Table 3.1 below, and bond lengths and angles in Tables 3.2 and 3.3. The data have been deposited with the Cambridge Crystallographic Data Centre as supplementary publication CCDC 2288521.

**Table 3.1** Crystal data and structure refinement parameters for complex **1**.

|                                             |                                                                               |
|---------------------------------------------|-------------------------------------------------------------------------------|
| Empirical formula                           | C <sub>64</sub> H <sub>50</sub> Ir <sub>2</sub> N <sub>6</sub> O <sub>2</sub> |
| Formula weight                              | 1319.50                                                                       |
| Temperature/K                               | 130.0                                                                         |
| Crystal system                              | monoclinic                                                                    |
| Space group                                 | C2/c                                                                          |
| a/Å                                         | 30.2193(13)                                                                   |
| b/Å                                         | 12.6557(5)                                                                    |
| c/Å                                         | 14.4652(6)                                                                    |
| α/°                                         | 90                                                                            |
| β/°                                         | 115.1202(14)                                                                  |
| γ/°                                         | 90                                                                            |
| Volume/Å <sup>3</sup>                       | 5008.9(4)                                                                     |
| Z                                           | 4                                                                             |
| ρ <sub>calc</sub> /cm <sup>3</sup>          | 1.750                                                                         |
| μ/mm <sup>-1</sup>                          | 5.362                                                                         |
| F(000)                                      | 2584.0                                                                        |
| Crystal size/mm <sup>3</sup>                | 0.045 × 0.032 × 0.006                                                         |
| Radiation                                   | MoKα (λ = 0.71073)                                                            |
| 2θ range for data collection/°              | 4.28 to 55.996                                                                |
| Index ranges                                | -39 ≤ h ≤ 39, -16 ≤ k ≤ 16, -19 ≤ l ≤ 19                                      |
| Reflections collected                       | 52134                                                                         |
| Independent reflections                     | 6047 [R <sub>int</sub> = 0.1281, R <sub>sigma</sub> = 0.0757]                 |
| Data/restraints/parameters                  | 6047/0/337                                                                    |
| Goodness-of-fit on F <sup>2</sup>           | 1.030                                                                         |
| Final R indexes [I >= 2σ (I)]               | R <sub>1</sub> = 0.0416, wR <sub>2</sub> = 0.0694                             |
| Final R indexes [all data]                  | R <sub>1</sub> = 0.0765, wR <sub>2</sub> = 0.0790                             |
| Largest diff. peak/hole / e Å <sup>-3</sup> | 1.00/-1.48                                                                    |

**Table 3.2** Bond lengths in complex 1.

| Atom | Atom | Length/Å |
|------|------|----------|
| Ir1  | O1   | 2.149(4) |
| Ir1  | N1   | 2.183(4) |
| Ir1  | N2   | 2.043(5) |
| Ir1  | N3   | 2.023(5) |
| Ir1  | C16  | 2.011(6) |
| Ir1  | C28  | 1.997(6) |
| O1   | C5   | 1.313(7) |
| N1   | C1   | 1.341(6) |
| N1   | C2   | 1.355(7) |
| N2   | C10  | 1.343(7) |
| N2   | C14  | 1.386(7) |
| N3   | C22  | 1.343(8) |
| N3   | C26  | 1.366(8) |
| C2   | C3   | 1.385(7) |
| C2   | C4   | 1.471(8) |
| C4   | C5   | 1.410(8) |
| C4   | C9   | 1.410(9) |
| C5   | C6   | 1.409(8) |
| C6   | C7   | 1.371(9) |
| C7   | C8   | 1.400(9) |
| C8   | C9   | 1.369(8) |
| C10  | C11  | 1.368(8) |
| C11  | C12  | 1.401(9) |

| Atom | Atom | Length/Å |
|------|------|----------|
| C12  | C13  | 1.377(9) |
| C13  | C14  | 1.384(8) |
| C14  | C15  | 1.453(8) |
| C15  | C16  | 1.400(8) |
| C15  | C20  | 1.402(8) |
| C16  | C17  | 1.401(8) |
| C17  | C18  | 1.385(8) |
| C18  | C19  | 1.403(9) |
| C18  | C21  | 1.496(9) |
| C19  | C20  | 1.375(9) |
| C22  | C23  | 1.379(9) |
| C23  | C24  | 1.370(9) |
| C24  | C25  | 1.368(9) |
| C25  | C26  | 1.394(8) |
| C26  | C27  | 1.453(8) |
| C27  | C28  | 1.425(8) |
| C27  | C32  | 1.394(9) |
| C28  | C29  | 1.398(9) |
| C29  | C30  | 1.405(8) |
| C30  | C31  | 1.396(9) |
| C30  | C33  | 1.496(9) |
| C31  | C32  | 1.375(9) |

**Table 3.3** Bond angles in complex 1.

| Atom            | Atom | Atom            | Angle/°   |
|-----------------|------|-----------------|-----------|
| O1              | Ir1  | N1              | 81.31(17) |
| N2              | Ir1  | O1              | 90.61(18) |
| N2              | Ir1  | N1              | 97.17(19) |
| N3              | Ir1  | O1              | 91.93(18) |
| N3              | Ir1  | N1              | 87.04(19) |
| N3              | Ir1  | N2              | 175.4(2)  |
| C16             | Ir1  | O1              | 86.8(2)   |
| C16             | Ir1  | N1              | 167.9(2)  |
| C16             | Ir1  | N2              | 80.6(2)   |
| C16             | Ir1  | N3              | 95.7(2)   |
| C28             | Ir1  | O1              | 172.4(2)  |
| C28             | Ir1  | N1              | 100.9(2)  |
| C28             | Ir1  | N2              | 96.3(2)   |
| C28             | Ir1  | N3              | 80.9(2)   |
| C28             | Ir1  | C16             | 91.2(2)   |
| C5              | O1   | Ir1             | 113.8(4)  |
| C1              | N1   | Ir1             | 120.9(4)  |
| C1              | N1   | C2              | 117.2(5)  |
| C2              | N1   | Ir1             | 121.4(4)  |
| C10             | N2   | Ir1             | 126.3(4)  |
| C10             | N2   | C14             | 118.5(5)  |
| C14             | N2   | Ir1             | 115.1(4)  |
| C22             | N3   | Ir1             | 124.0(4)  |
| C22             | N3   | C26             | 120.3(5)  |
| C26             | N3   | Ir1             | 115.6(4)  |
| N1              | C1   | N1 <sup>1</sup> | 126.7(8)  |
| N1              | C2   | C3              | 118.3(6)  |
| N1              | C2   | C4              | 122.3(5)  |
| C3              | C2   | C4              | 119.3(6)  |
| C2 <sup>1</sup> | C3   | C2              | 122.2(8)  |
| C5              | C4   | C2              | 120.8(5)  |
| C9              | C4   | C2              | 119.3(5)  |
| C9              | C4   | C5              | 119.8(5)  |
| O1              | C5   | C4              | 122.8(5)  |
| O1              | C5   | C6              | 119.2(5)  |
| C6              | C5   | C4              | 117.9(5)  |
| C7              | C6   | C5              | 121.3(6)  |
| C6              | C7   | C8              | 120.5(6)  |
| C9              | C8   | C7              | 119.6(6)  |

| Atom | Atom | Atom | Angle/°  |
|------|------|------|----------|
| C8   | C9   | C4   | 120.9(6) |
| N2   | C10  | C11  | 123.0(6) |
| C10  | C11  | C12  | 119.2(6) |
| C13  | C12  | C11  | 118.4(6) |
| C12  | C13  | C14  | 120.7(6) |
| N2   | C14  | C15  | 112.8(5) |
| C13  | C14  | N2   | 120.1(6) |
| C13  | C14  | C15  | 127.0(6) |
| C16  | C15  | C14  | 116.8(5) |
| C16  | C15  | C20  | 119.7(6) |
| C20  | C15  | C14  | 123.4(5) |
| C15  | C16  | Ir1  | 113.5(4) |
| C15  | C16  | C17  | 118.4(5) |
| C17  | C16  | Ir1  | 127.6(5) |
| C18  | C17  | C16  | 122.1(6) |
| C17  | C18  | C19  | 118.4(6) |
| C17  | C18  | C21  | 121.5(6) |
| C19  | C18  | C21  | 120.0(6) |
| C20  | C19  | C18  | 120.7(6) |
| C19  | C20  | C15  | 120.6(6) |
| N3   | C22  | C23  | 121.3(6) |
| C24  | C23  | C22  | 119.2(6) |
| C25  | C24  | C23  | 119.6(7) |
| C24  | C25  | C26  | 120.4(6) |
| N3   | C26  | C25  | 119.0(6) |
| N3   | C26  | C27  | 114.4(5) |
| C25  | C26  | C27  | 126.5(6) |
| C28  | C27  | C26  | 114.5(6) |
| C32  | C27  | C26  | 124.6(6) |
| C32  | C27  | C28  | 120.9(6) |
| C27  | C28  | Ir1  | 113.9(4) |
| C29  | C28  | Ir1  | 129.4(5) |
| C29  | C28  | C27  | 116.7(6) |
| C28  | C29  | C30  | 123.1(6) |
| C29  | C30  | C33  | 121.0(6) |
| C31  | C30  | C29  | 117.5(6) |
| C31  | C30  | C33  | 121.5(6) |
| C32  | C31  | C30  | 121.8(6) |
| C31  | C32  | C27  | 119.9(6) |

<sup>1</sup>1-X,+Y,3/2-Z



## 4. Theory

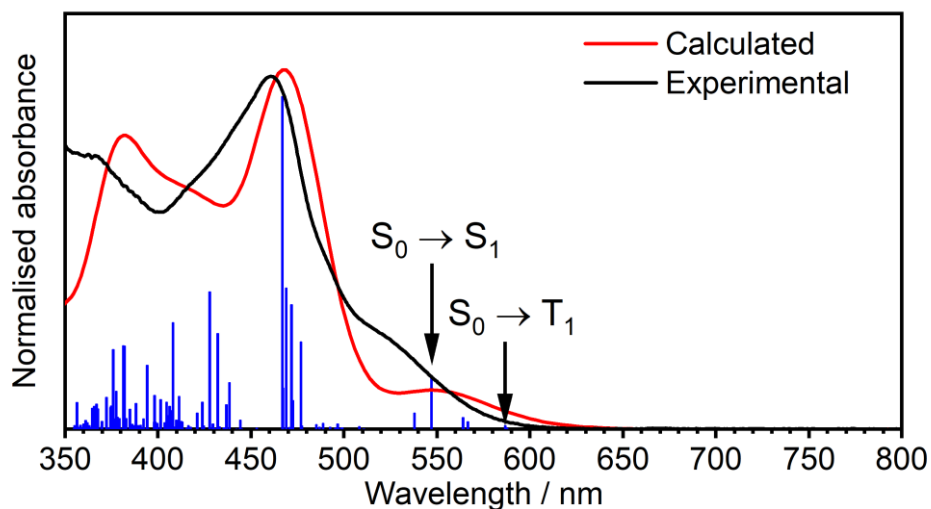

**Figure S4.1.** Simulated absorption spectrum of **1** calculated at the  $S_0$  geometry.

**Table S4.1.** Summary of the eight lowest spin-orbit coupling (SOC) excited states in complex **1** at the  $T_1$  geometry.

| SOC state | Dominant composition <sup>a</sup> | Assignment | Energy, eV | Oscillator strength | Radiative rate constant $k_r, s^{-1}$ | Boltzmann factor ( $T = 295 K$ ) <sup>b</sup> |
|-----------|-----------------------------------|------------|------------|---------------------|---------------------------------------|-----------------------------------------------|
| <b>1</b>  | 88.9% $T_1$                       | $T_1$      | 1.7471     | 0.000188            | $5.6 \times 10^4$                     | -                                             |
| <b>2</b>  | 88.7% $T_1$ , 2.0% $S_1$          |            | 1.7481     | 0.000252            | $7.5 \times 10^4$                     | 0.9608                                        |
| <b>3</b>  | 89.2% $T_1$                       |            | 1.7510     | 0.002906            | $8.7 \times 10^5$                     | 0.8672                                        |
| <b>4</b>  | 80.6% $S_1$ , 4.1% $T_2$          | $S_1$      | 1.8162     | 0.015177            | $4.9 \times 10^6$                     | 0.0659                                        |
| <b>5</b>  | 86.8% $T_2$ , 3.0% $T_3$          | $T_2$      | 1.9061     | 0.000283            | $1.0 \times 10^5$                     | 0.0019                                        |
| <b>6</b>  | 85.4% $T_2$ , 3.6% $S_1$          |            | 1.9072     | 0.001139            | $4.0 \times 10^5$                     | 0.0018                                        |
| <b>7</b>  | 87.8% $T_2$                       |            | 1.9119     | 0.004208            | $1.5 \times 10^6$                     | 0.0015                                        |
| <b>8</b>  | 81.9% $S_2$ , 5.1% $T_3$          | $S_2$      | 2.0102     | 0.014166            | $5.6 \times 10^6$                     | < 0.0001                                      |

<sup>a</sup> Listing only states with  $\geq 2\%$  contribution; <sup>b</sup> Product of the expression  $\exp(\Delta E_{1,n} / RT)$  for  $T = 295 K$ , where  $\Delta E_{1,n}$  is the energy difference between the SOC states 1 and n.

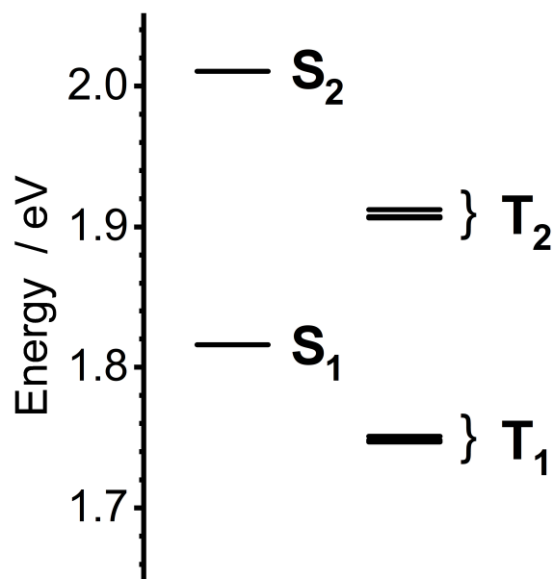

**Figure S4.2.** Energy of the eight lowest spin-orbit coupling (SOC) excited states in complex **1** at the  $T_1$  geometry presented in a graphical form.

## 5. Photophysics

### a) Solution state

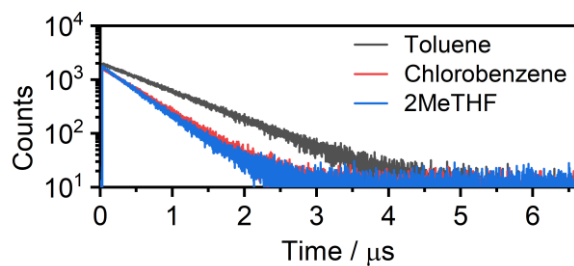

**Figure S5.1.** Photoluminescence decay traces recorded in degassed dilute ( $10^{-5}$  M) solutions of **1** in solvents indicated in figure legend, at room temperature.

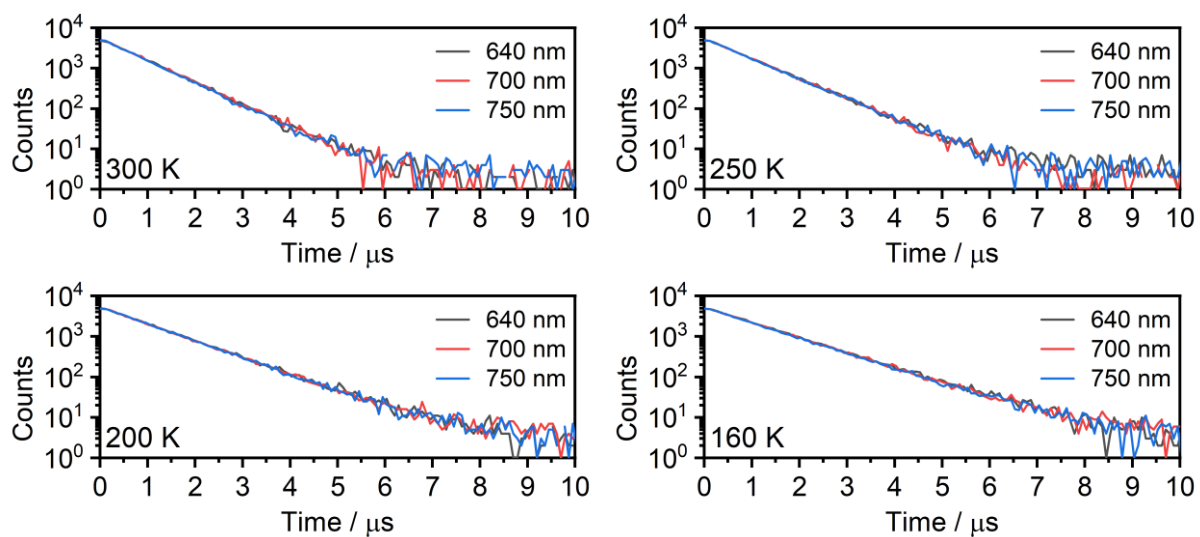

**Figure S5.2.** Photoluminescence decay traces recorded in degassed dilute ( $10^{-5}$  M) solution of **1** in toluene, at temperatures indicated in each figure legend.

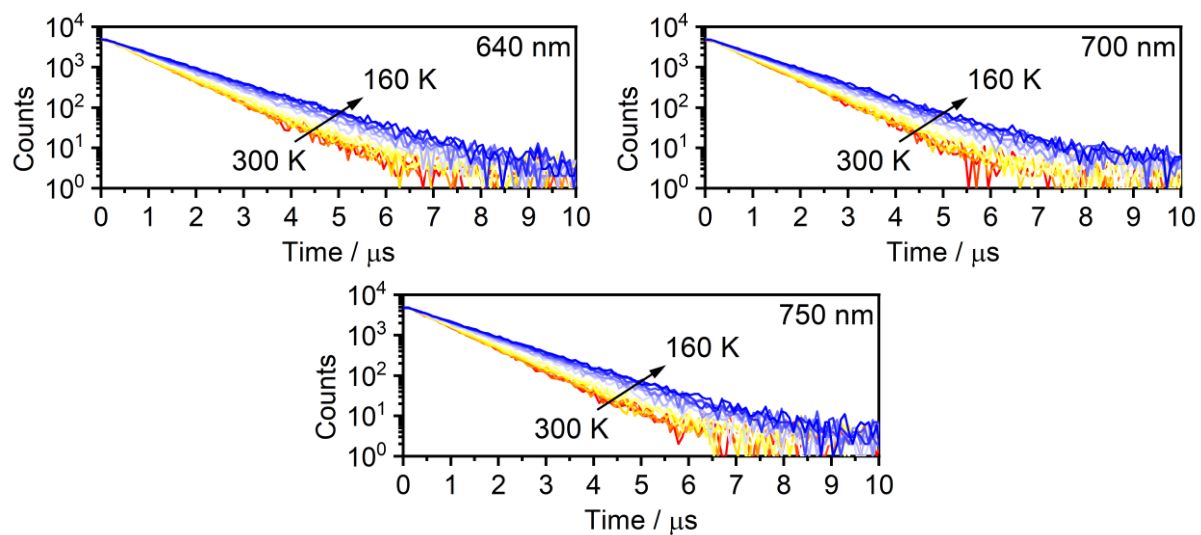

**Figure S5.3.** Photoluminescence decay traces recorded in degassed dilute ( $10^{-5}$  M) solution of **1** in toluene, at temperatures from 160 to 300 K at collection wavelengths indicated in each figure legend.

b) Solid film (polymer matrix)

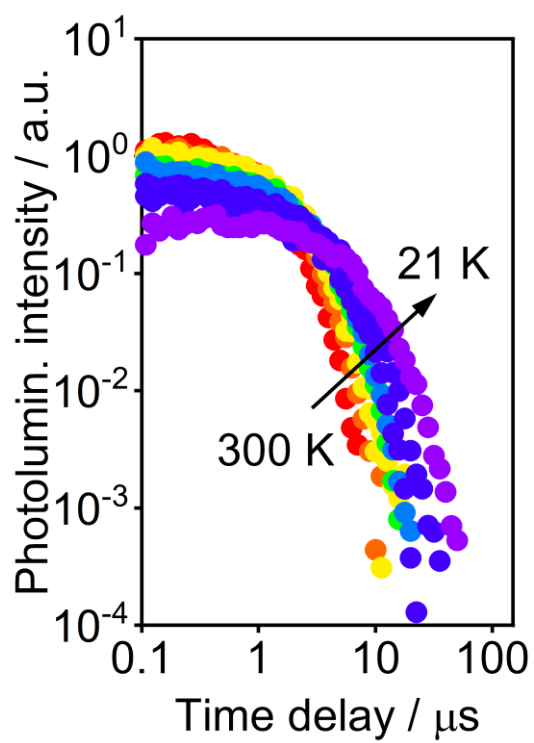

**Figure S5.4.** Photoluminescence decay traces recorded in dilute polystyrene film of **1** (0.1 % w/w) in vacuum at temperatures from 21 to 300 K.

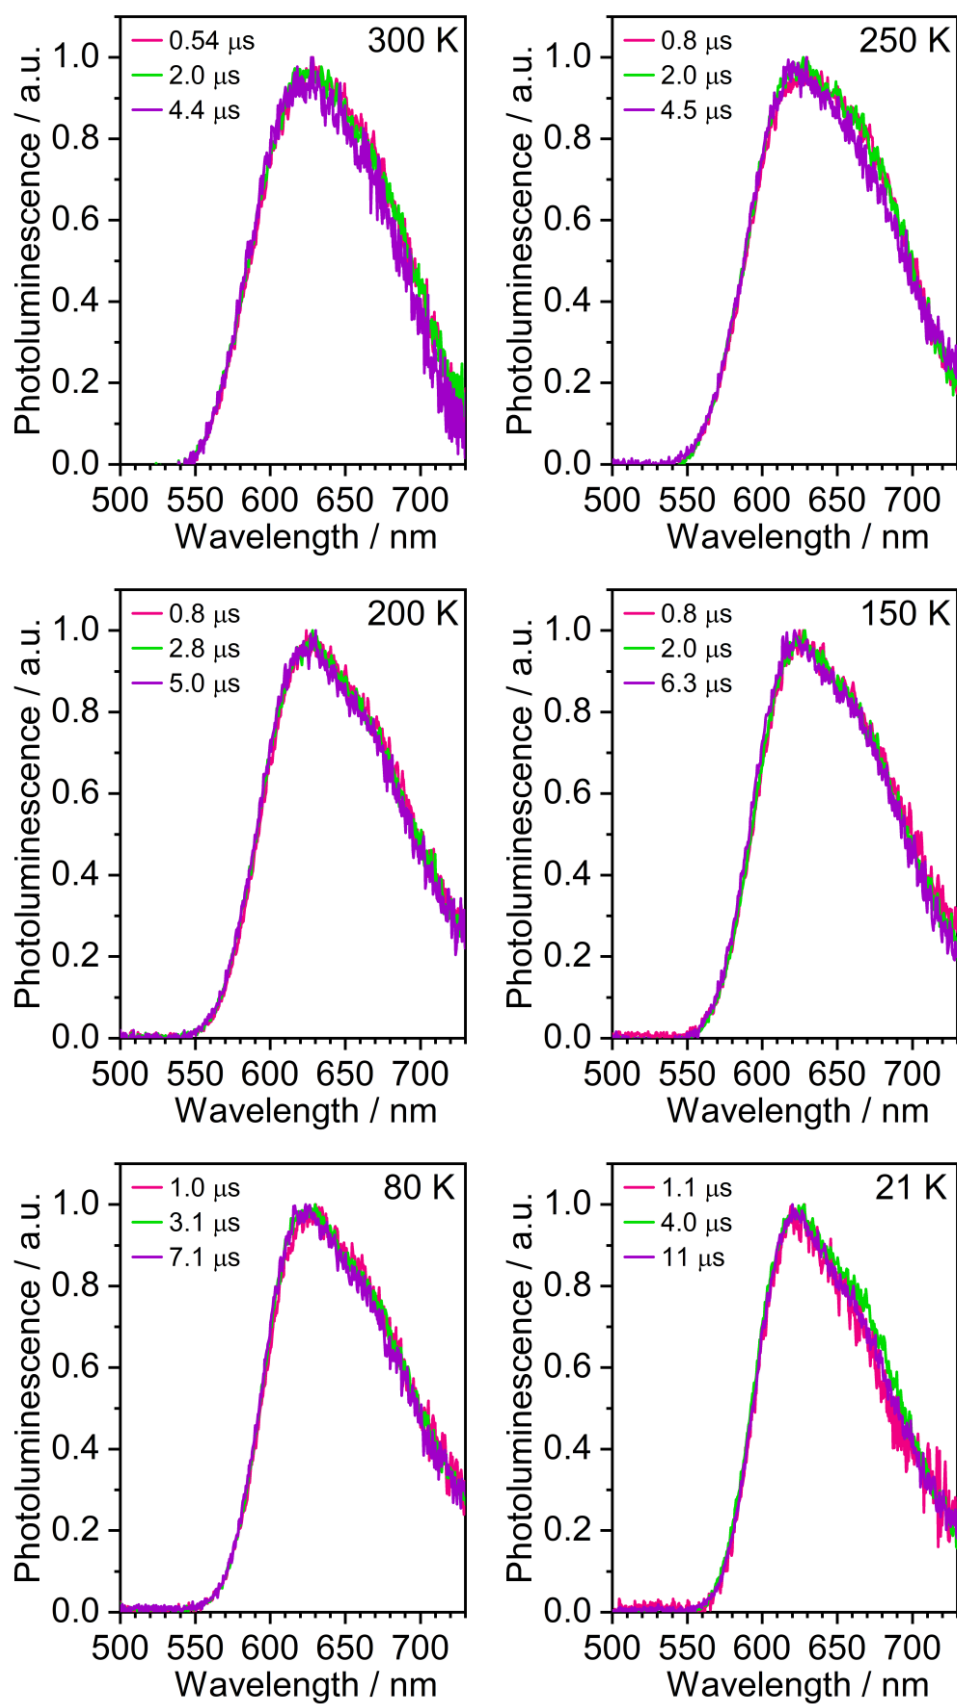

**Figure S5.5.** Time-resolved photoluminescence spectra recorded in dilute polystyrene film of **1** (0.1 % w/w) in vacuum at temperatures and delay times indicated in each figure legend.

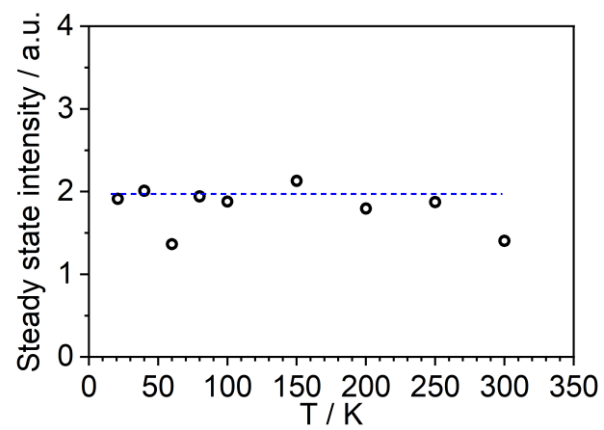

**Figure S5.6.** Steady-state photoluminescence intensity recorded in dilute polystyrene film of **1** (0.1 % w/w) as a function of temperature.

## 6. Electrochemistry

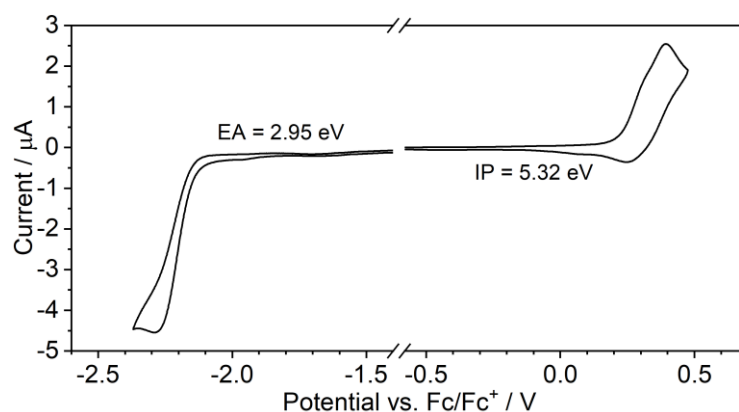

**Figure S6.1** Cyclic voltammogram (CV) of **1** ( $c = 10^{-3} \text{ M}$ ) in 0.1 M  $\text{Bu}_4\text{NBF}_4 / \text{CH}_2\text{Cl}_2$  solution.

Complex **1** displays partly reversible oxidation and irreversible reduction processes. Interestingly, the anodic half wave of the oxidation process is composed of two signals, indicating only a small potential difference between formation of cations and di-cations in the process. This behaviour of the oxidation half wave may suggest sequential oxidation of the two coordinated metal centres, rather than them oxidising together at once.



## 7. OLED devices

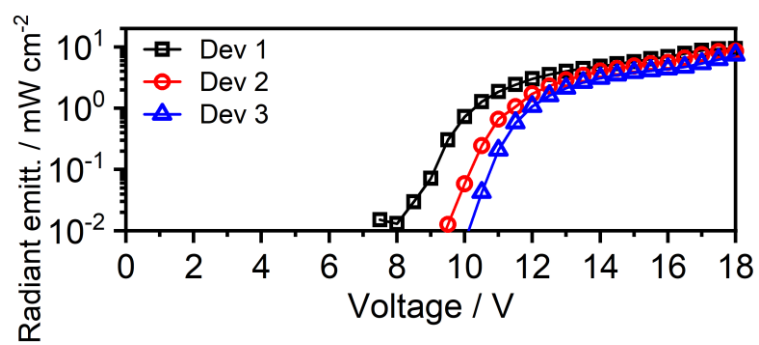

**Figure S7.1.** Radiant emittance-voltage (J-V) characteristics of devices 1-3.

## 8. References

- 1 M. Roemelt, D. Maganas, S. DeBeer and F. Neese, *J. Chem. Phys.*, 2013, **138**, 204101.
- 2 B. de Souza, G. Farias, F. Neese and R. Izsák, *J. Chem. Theory Comput.*, 2019, **15**, 1896–1904.
- 3 E. van Lenthe, E. J. Baerends and J. G. Snijders, *J. Chem. Phys.*, 1993, **99**, 4597–4610.
- 4 E. van Lenthe, E. J. Baerends and J. G. Snijders, *J. Chem. Phys.*, 1994, **101**, 9783–9792.
- 5 F. Neese, *WIREs Comput. Mol. Sci.*, 2012, **2**, 73–78.
- 6 F. Neese, *WIREs Comput. Mol. Sci.*, , DOI:10.1002/wcms.1606.
- 7 A. D. Becke, *Phys. Rev. A*, 1988, **38**, 3098–3100.
- 8 F. Weigend and R. Ahlrichs, *Phys. Chem. Chem. Phys.*, 2005, **7**, 3297.
- 9 A.-R. Allouche, *J. Comput. Chem.*, 2011, **32**, 174–182.
- 10 F. Weigend, *Phys. Chem. Chem. Phys.*, 2006, **8**, 1057.
- 11 S. Grimme, S. Ehrlich and L. Goerigk, *J. Comput. Chem.*, 2011, **32**, 1456–1465.
- 12 S. Grimme, J. Antony, S. Ehrlich and H. Krieg, *J. Chem. Phys.*, 2010, **132**, 154104.
- 13 D. A. Pantazis, X. Y. Chen, C. R. Landis and F. Neese, *J. Chem. Theory Comput.*, 2008, **4**, 908–919.
- 14 P. Data, P. Pander, M. Lapkowski, A. Swist, J. Soloducho, R. R. Reghu and J. V. Grazulevicius, *Electrochim. Acta*, 2014, **128**, 430–438.
- 15 P. Pander, P. Data, R. Turczyn, M. Lapkowski, A. Swist, J. Soloducho and A. P. Monkman, *Electrochim. Acta*, 2016, **210**, 773–782.
- 16 C. M. Cardona, W. Li, A. E. Kaifer, D. Stockdale and G. C. Bazan, *Adv. Mater.*, 2011, **23**, 2367–2371.
- 17 J.-L. Bredas, *Mater. Horiz.*, 2014, **1**, 17–19.
- 18 P. Pander, P. Data and F. B. Dias, *J. Vis. Exp.*, , DOI:10.3791/56614.
- 19 D. de Sa Pereira, A. P. Monkman and P. Data, *J. Vis. Exp.*, , DOI:10.3791/56593.
- 20 O. V. Dolomanov, L. J. Bourhis, R. J. Gildea, J. A. K. Howard and H. Puschmann, *J. Appl. Crystallogr.*, 2009, **42**, 339–341.
- 21 G. M. Sheldrick, *Acta Crystallogr. Sect. A Found. Crystallogr.*, 2008, **64**, 112–122.
